# Supplementary material for: On the Analysis of a Repeated Measure Design in Genome-Wide Association Analysis
Source: PubMed Central journal article supplement (PMC4276614; doi:10.3390/ijerph111212283), 2014-11-28

# On the Analysis of a Repeated Measure Design in Genome-Wide Association Analysis

Figure S1. Q-Q plots for eight phenotypes with the results from longitudinal data analysis.

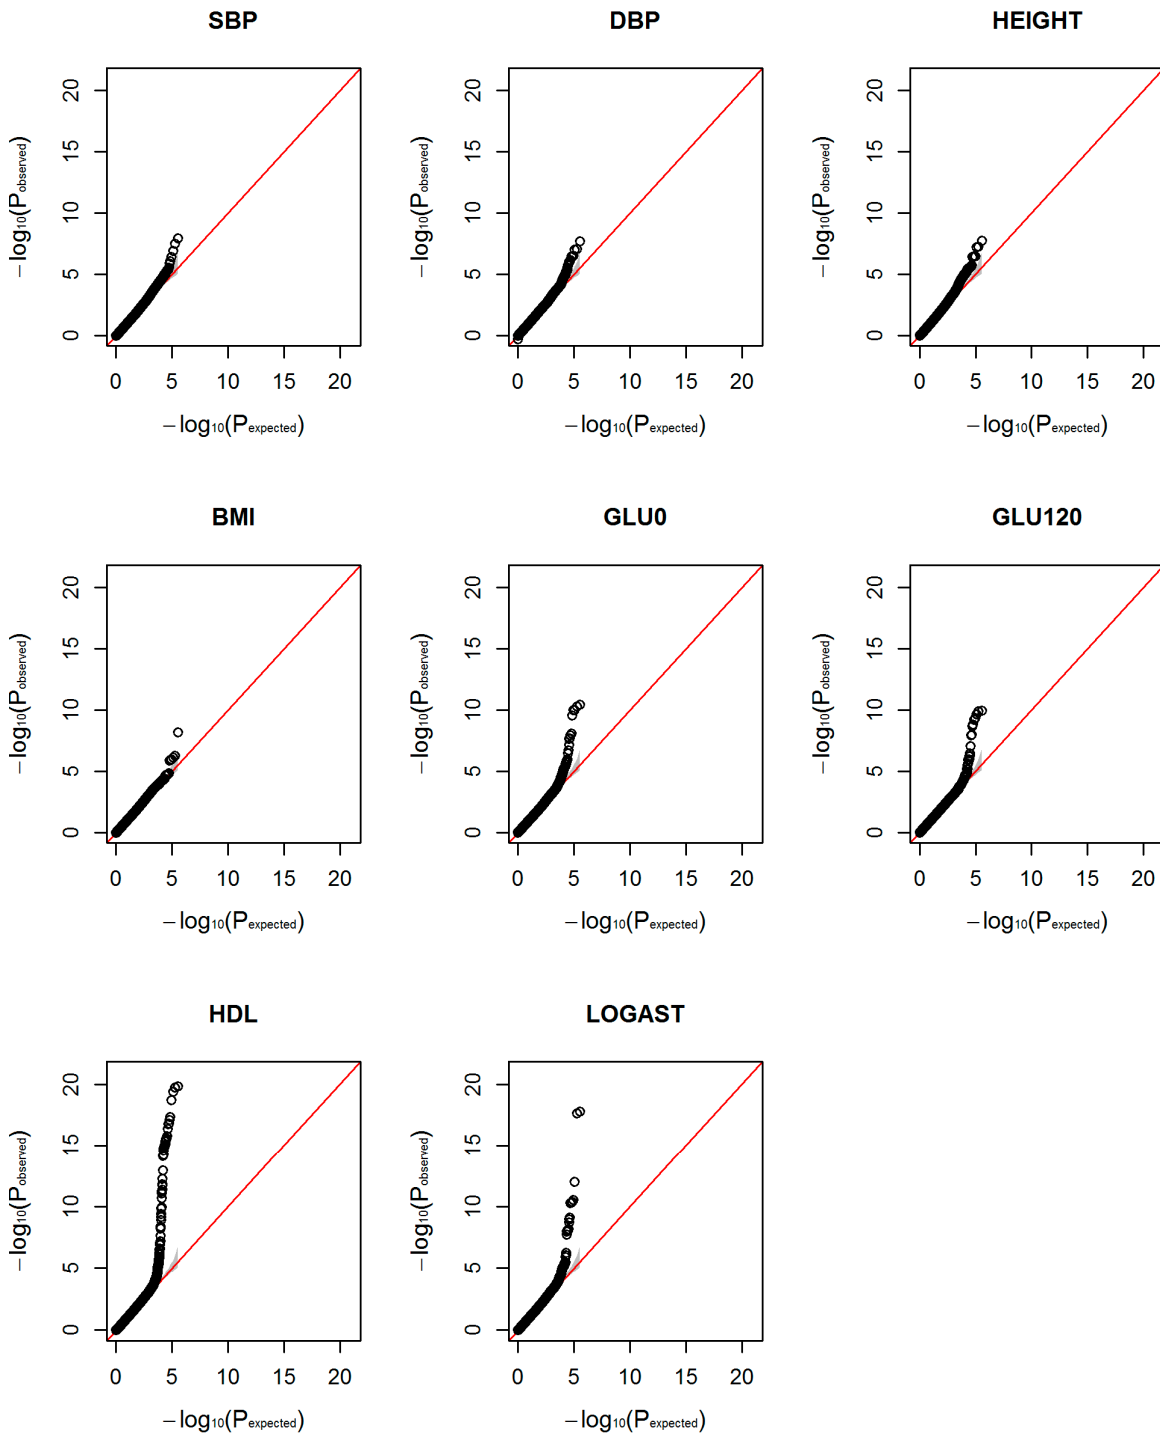

Figure S2. Q-Q plots for eight phenotypes with the results from cross-sectional data analysis.

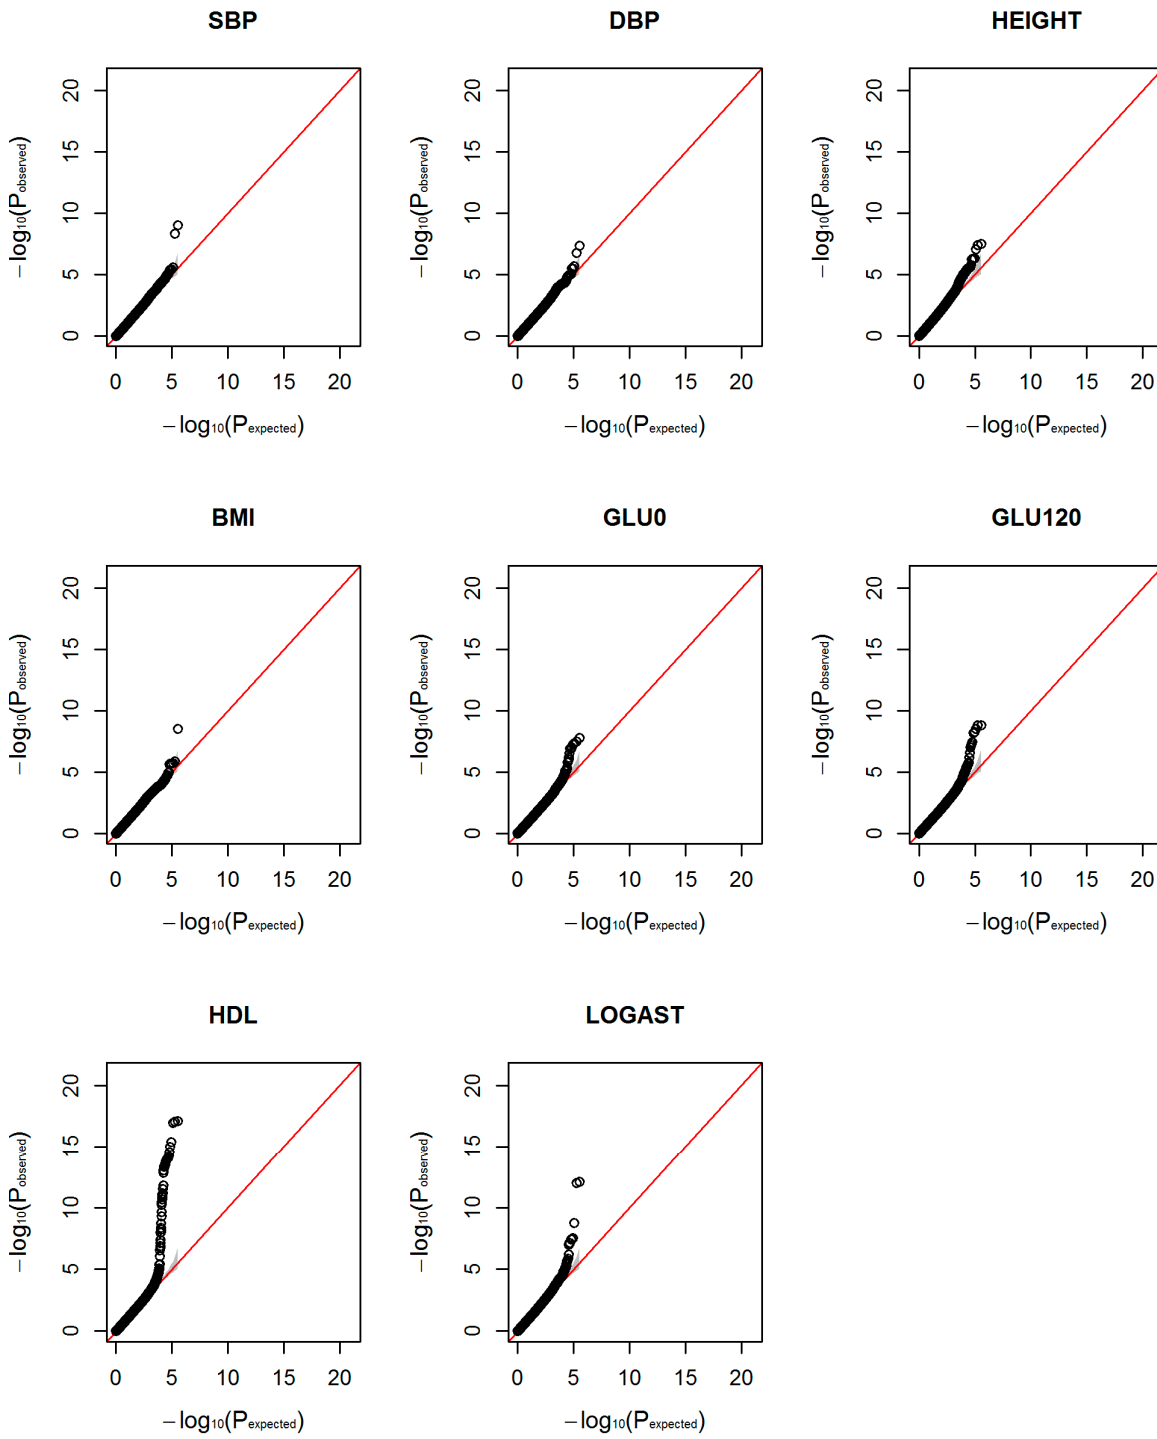

Figure S3. Manhattan plots for eight phenotypes with the results from longitudinal data analysis.

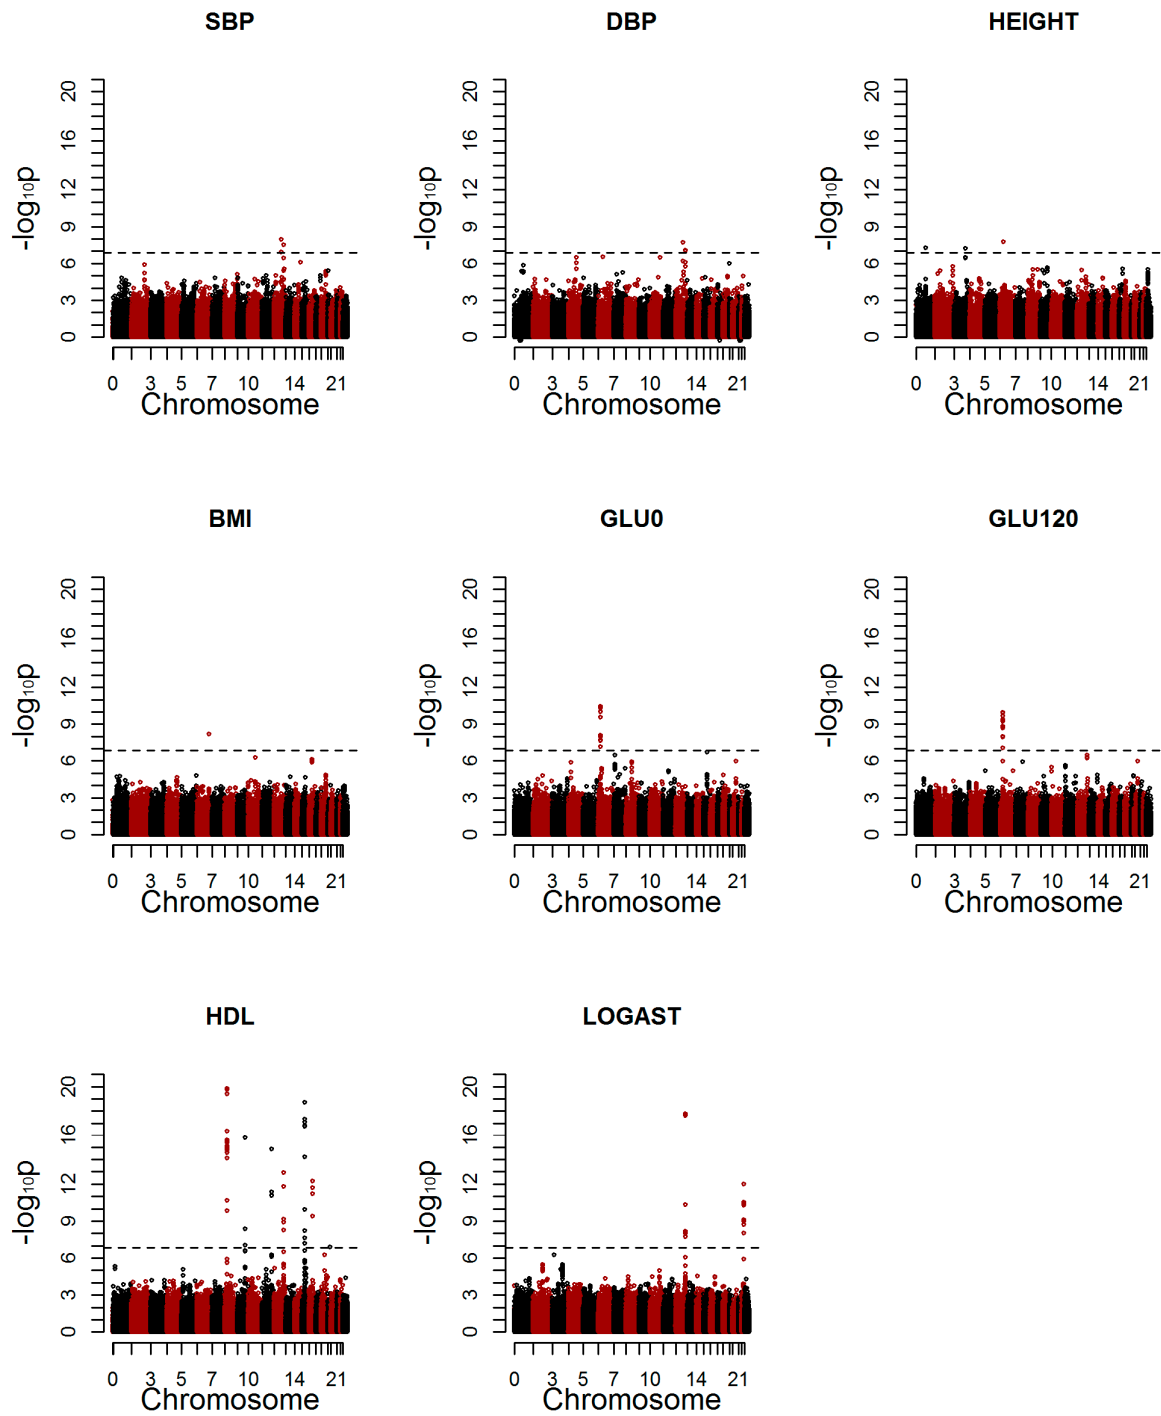

Figure S4. Manhattan plots for eight phenotypes with the results from cross-sectional data analysis.

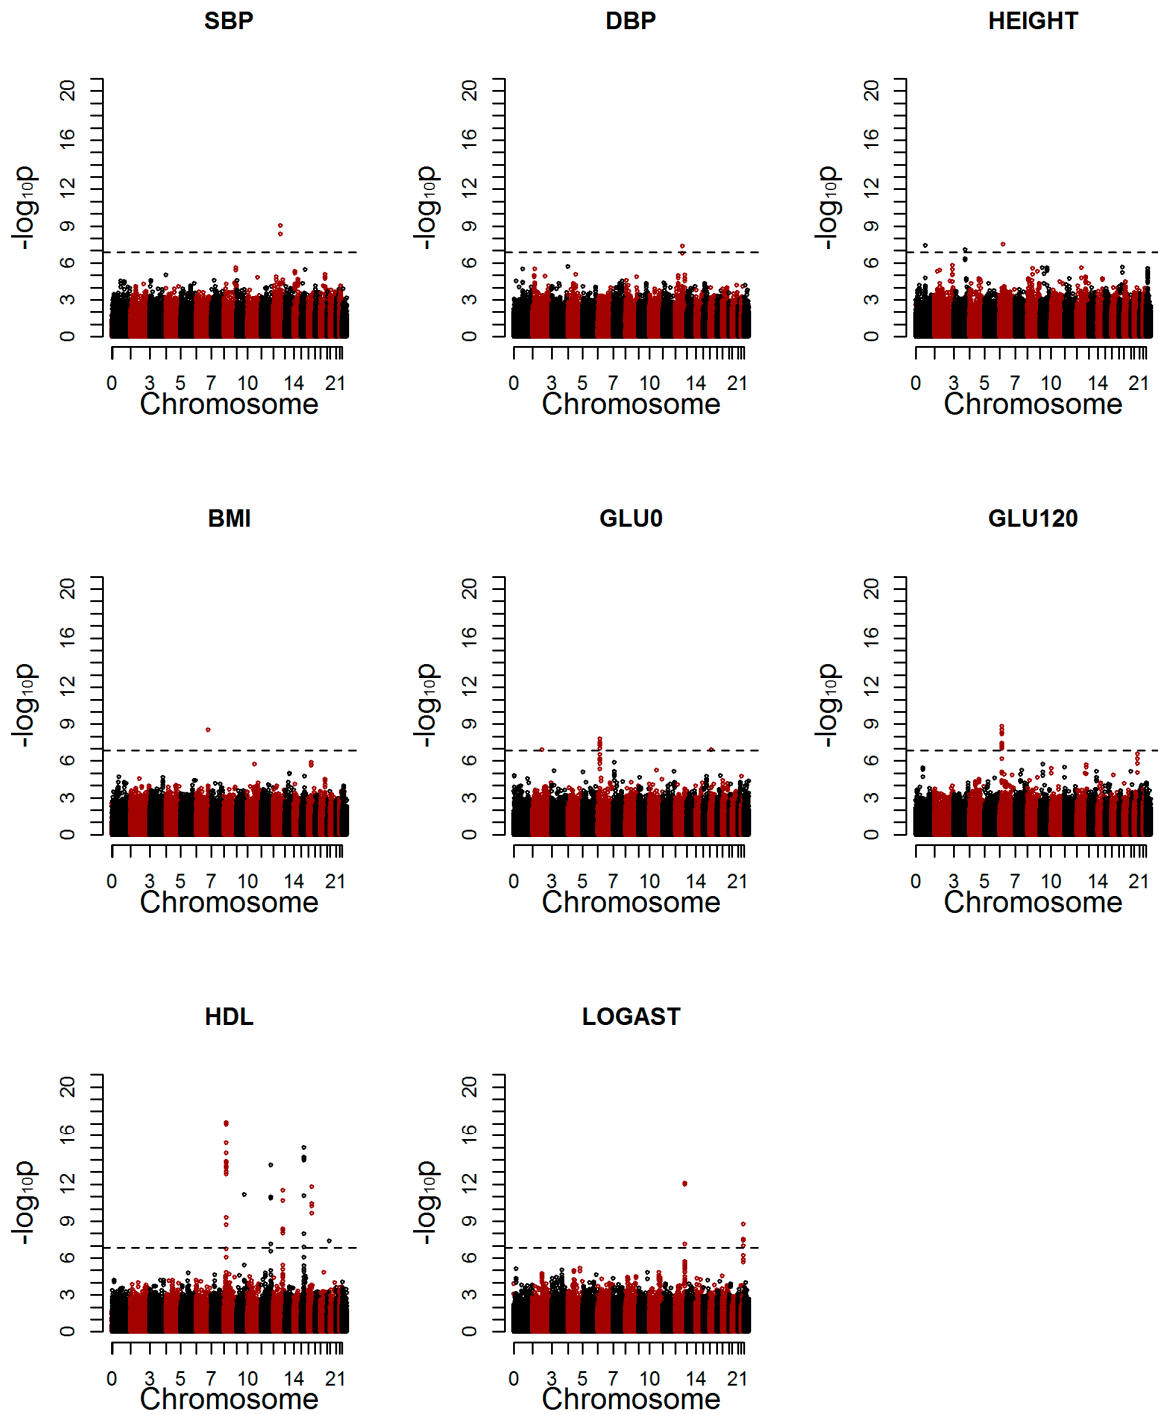

Supplement: ijerph-11-12283-s001.pdf [file ijerph-11-12283-s001.pdf]
